# Supplementary material for: Constitutive androstane receptor induced-hepatomegaly and liver regeneration is partially via yes-associated protein activation
Source: PubMed Central journal article supplement — Acta Pharm Sin B. 2020 Nov 28;11(3):727–37. doi: 10.1016/j.apsb.2020.11.021 (PMC7982502; doi:10.1016/j.apsb.2020.11.021), 2020-11-28
Supplement: mmc1.pdf [file mmc1.pdf]

Supporting Information for

Original article

## **Constitutive androstane receptor induced- hepatomegaly is partially via yes-associated protein activation**

**Yue Gao<sup>a,†</sup>, Shicheng Fan<sup>a,†</sup>, Hua Li<sup>b</sup>, Yiming Jiang<sup>a</sup>, Xinpeng Yao<sup>a</sup>, Shuguang Zhu<sup>b</sup>, Xiao Yang<sup>a</sup>, Ruimin Wang<sup>a</sup>, Jianing Tian<sup>a</sup>, Frank J. Gonzalez<sup>c</sup>, Min Huang<sup>a,\*</sup>, Huichang Bi<sup>a,\*</sup>**

<sup>a</sup>*Guangdong Provincial Key Laboratory of New Drug Design and Evaluation, School of Pharmaceutical Sciences, Sun Yat-sen University, Guangzhou 510006, China*

<sup>b</sup>*Department of Hepatic Surgery, the Third Affiliated Hospital, Sun Yat-sen University, Guangzhou 510006, China*

<sup>c</sup>*Laboratory of Metabolism, Center for Cancer Research, National Cancer Institute, NIH, Bethesda, MD 20892, USA*

Received 10 June 2020; received in revised form 9 September 2020; accepted 14 September 2020

<sup>†</sup>These authors made equal contributions to this work.

\*Corresponding authors. Tel.: +86 20 39943470; fax: +86 20 39943000.

E-mail addresses: [bihchang@mail.sysu.edu.cn](mailto:bihchang@mail.sysu.edu.cn) (Huichang Bi), [huangmin@mail.sysu.edu.cn](mailto:huangmin@mail.sysu.edu.cn) (Min Huang).

**FigureS1**

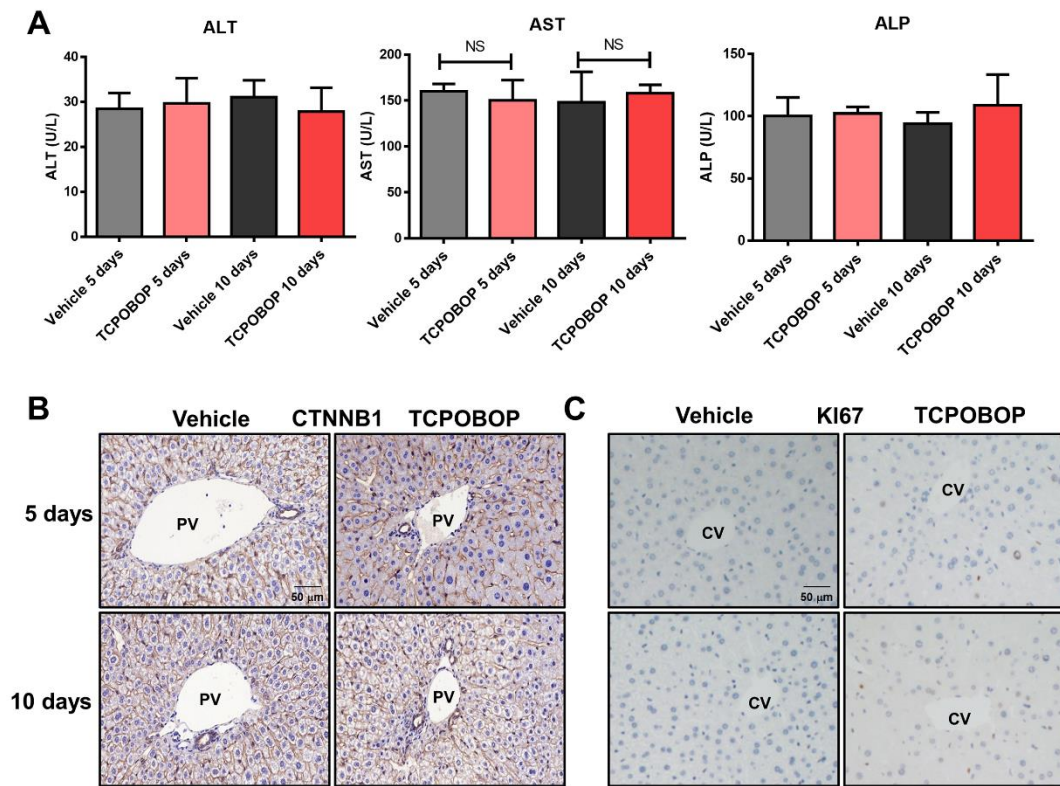

**Figure S1** The concentrations of ALT, AST and ALP in TCPOBOP-treated mice, the staining of KI67 in CV area and the CTNNB1 staining in PV area. (A) The concentrations of serum ALT, AST and ALP were not changed significantly after treated by TCPOBOP. (B) CTNNB1 staining results in PV area. (C) KI67 staining results in CV area. Data are presented as mean  $\pm$  SD,  $n = 5$ .

**FigureS2**

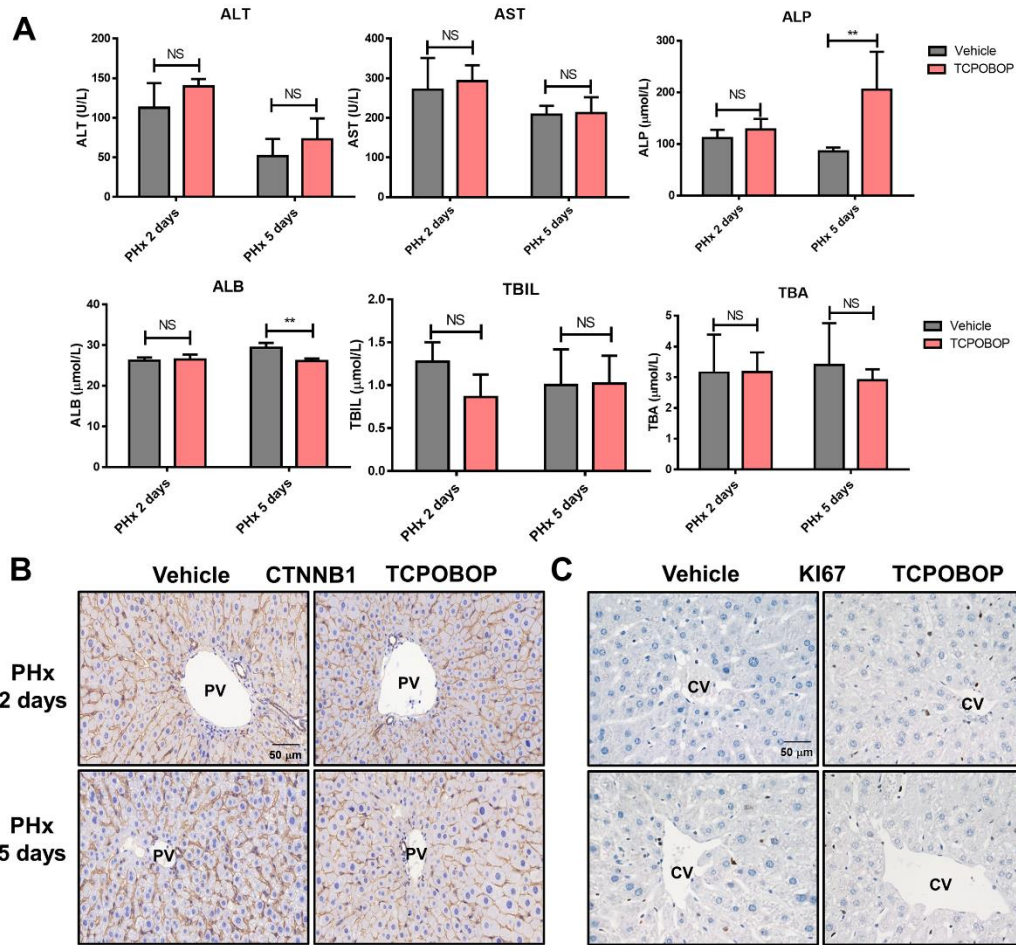

**Figure S2** The concentrations of ALT, AST, ALP, ALB, TBIL and TBA in TCPOBOP-treated PHx mice, the staining of KI67 in CV area and the CTNNB1 staining in PV area. (A) The concentrations of serum ALT, AST, and TBA were not changed significantly after treated by TCPOBOP in PHx model. (B) CTNNB1 staining results in PV area. (C) KI67 staining results in CV area. Data are presented as mean  $\pm$  SD,  $n = 5$ ; \*\* $P < 0.01$ , significantly different to the control; Student's  $t$  test.

**FigureS3**

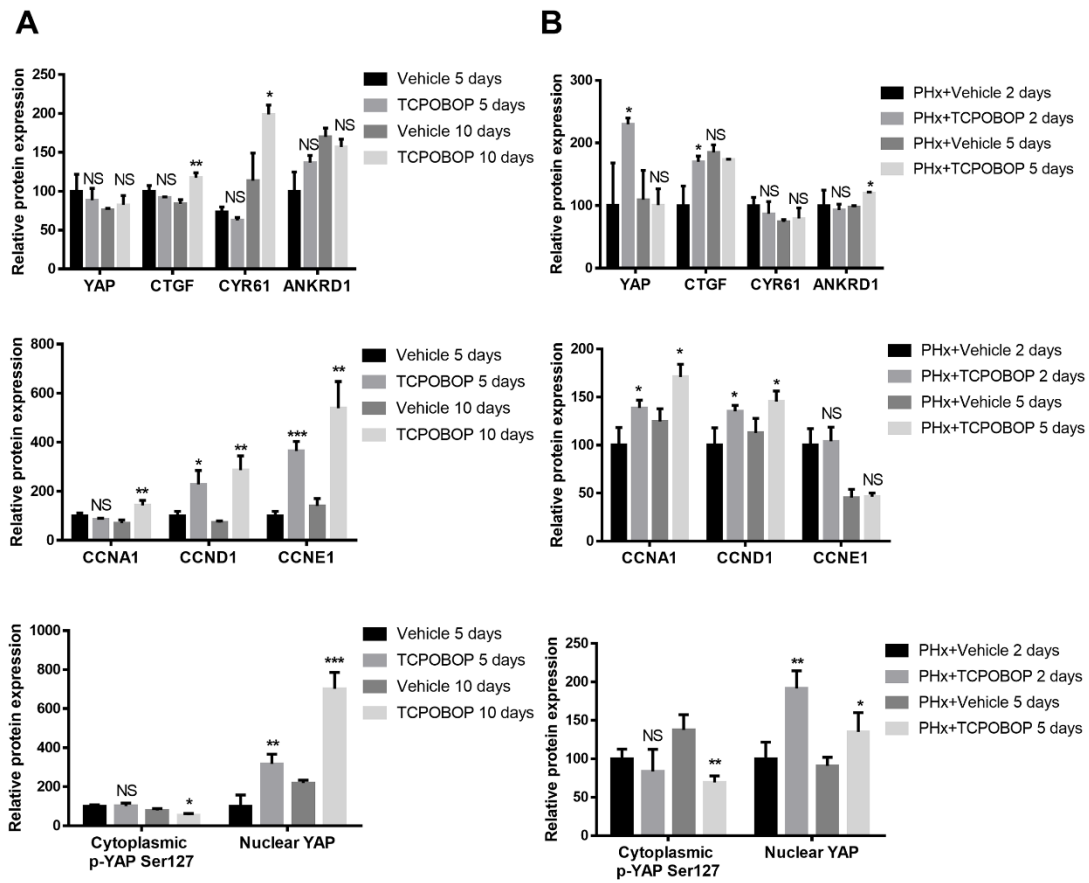

**Figure S3** Quantification of Western blot results in wildtype mice and PHx mice after treated by TCPOBOP. (A) Quantification of western blot results in wildtype mice treated with TCPOBOP or corn oil for 5 or 10 days. (B) Quantification of Western blot results in PHx mice model. Data are presented as mean  $\pm$  SD,  $n = 5$ ; \* $P < 0.05$ , \*\* $P < 0.01$ , \*\*\* $P < 0.001$ , significantly different to the control; Student's  $t$  test.

**Figure S4**

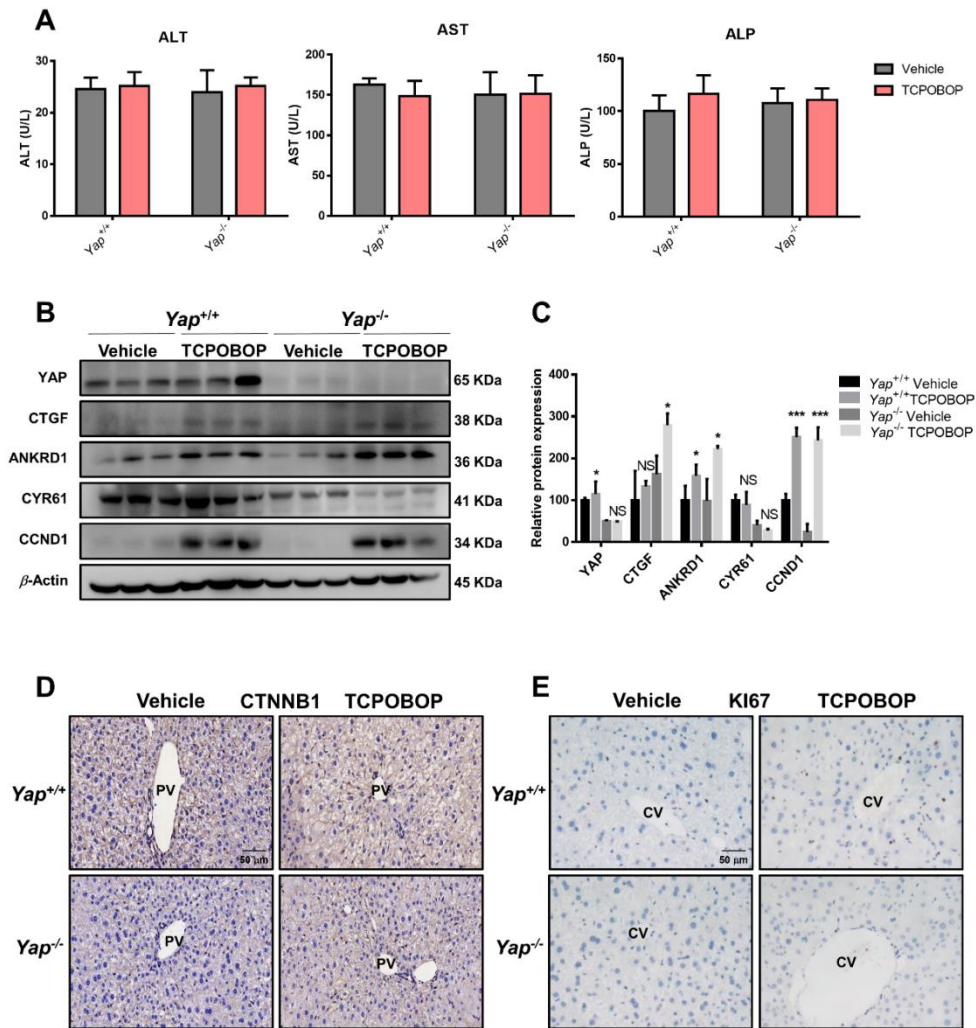

**Figure S4** (A) The concentrations of serum ALT, AST, and ALP were not changed significantly after treated by TCPOBOP in wildtype or *Yap*<sup>-/-</sup> mice. (B) Western blot analysis suggested that YAP was absent in *Yap*<sup>-/-</sup> mice, but YAP downstream targets were still upregulated in TCPOBOP-treated *Yap*<sup>-/-</sup> mice. (C) Quantification of western blot results in wildtype or *Yap*<sup>-/-</sup> mice. (D) CTNNB1 staining in PV area of wildtype or *Yap*<sup>-/-</sup> mice. (E) KI67 staining in CV area of wildtype or *Yap*<sup>-/-</sup> mice. Data are presented as mean  $\pm$  SD,  $n = 5$ ; \* $P < 0.05$ , \*\*\* $P < 0.001$ , significantly different to the control; Student's  $t$  test.

**Table S1** Sequences of primers and probes for quantitative real-time PCR.

| Gene name     | Primers (5'–3') forward | Primers (5'–3') reverse |
|---------------|-------------------------|-------------------------|
| <i>C-Myc</i>  | ATGCCCTCAACGTGAACTTC    | GTCGCAGATGAAATAGGGCTG   |
| <i>Egfr</i>   | GCCATCTGGGCCAAAGATACC   | GTCTTCGCATGAATAGGCCAAT  |
| <i>Met</i>    | CCCCAACTTCACGGCAGAAA    | GTAGTTTGTGGCTCCGAGATAAA |
| <i>Ctnnb1</i> | ATGGAGCCGGACAGAAAAGC    | TGGGAGGTGTCAACATCTTCTT  |
| <i>Foxm1</i>  | CAGAATGCCCCGAGTGAAACA   | GTGGGGTGGTTGATAATCTTGAT |
| <i>Gapdh</i>  | AGGTCGGTGTGAACGGATTTG   | GGGGTCGTTGATGGCAACA     |
